# Supplementary material for: Antimicrobial Properties of New Polyamines Conjugated with Oxygen-Containing Aromatic Functional Groups
Source: MDPI journal article supplement (doi:10.3390/molecules28227678), 2023-11-20
Supplement: s1 [file s1]

## Antimicrobial properties of new polyamines conjugated with oxygen containing aromatic functional groups

|                                                                                              |    |
|----------------------------------------------------------------------------------------------|----|
| <b>Figure S1.</b> $^1\text{H}$ NMR spectra of the new compounds .....                        | 2  |
| <b>Figure S2.</b> $^{13}\text{C}$ NMR spectra of the new compounds.....                      | 5  |
| <b>Figure S3.</b> ATR-IR spectra of all the new compounds.....                               | 7  |
| <b>Figure S4.</b> Scheme and X-ray crystallographic structure of <b>3a</b> ·3HCl. ....       | 10 |
| <b>Table S1.</b> Crystal data, data collection parameters, and results of the analysis. .... | 11 |
| <b>Figure S5.</b> Molar fraction species distribution diagrams. ....                         | 13 |
| <b>Figure S6.</b> Determination of the minimal microbicidal concentration. ....              | 15 |
| <b>Figure S7.</b> Cytotoxicity determination by FACS. ....                                   | 16 |

**Figure S1.**  $^1\text{H}$  NMR spectra of the new compounds

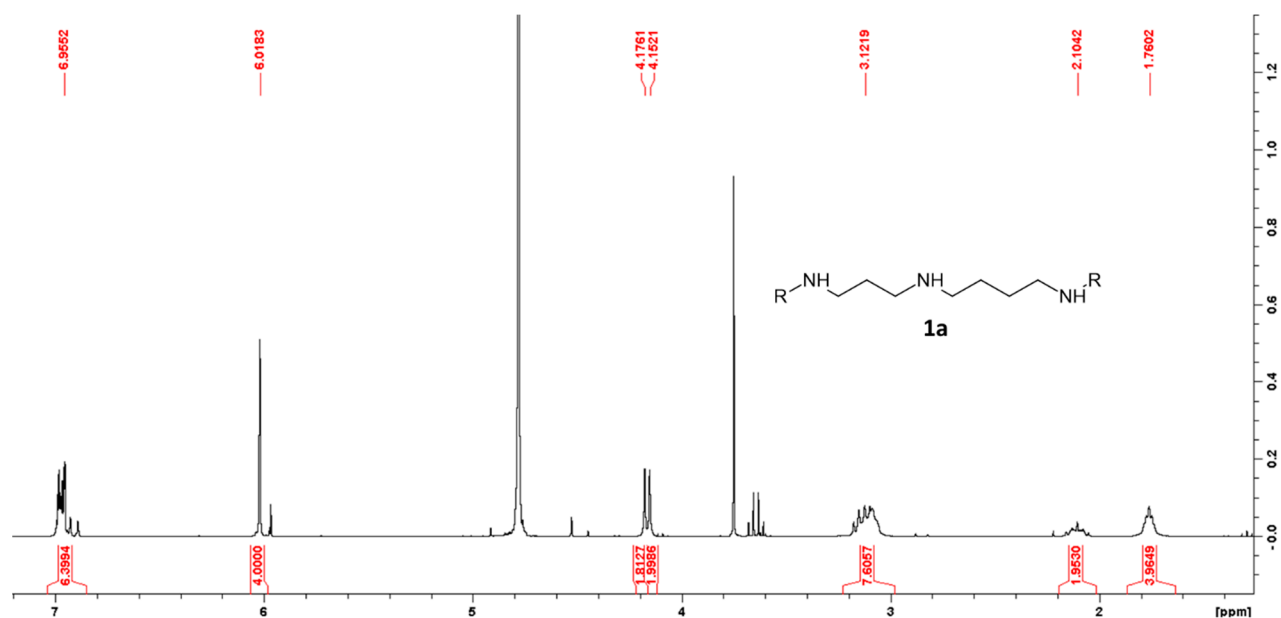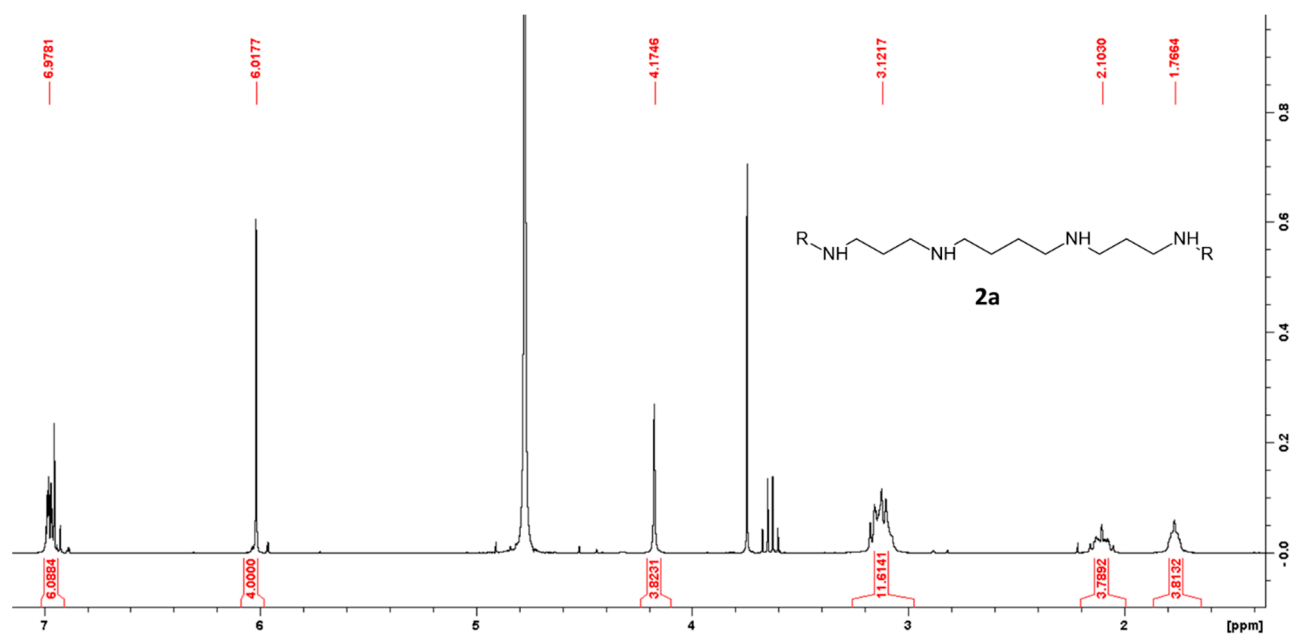

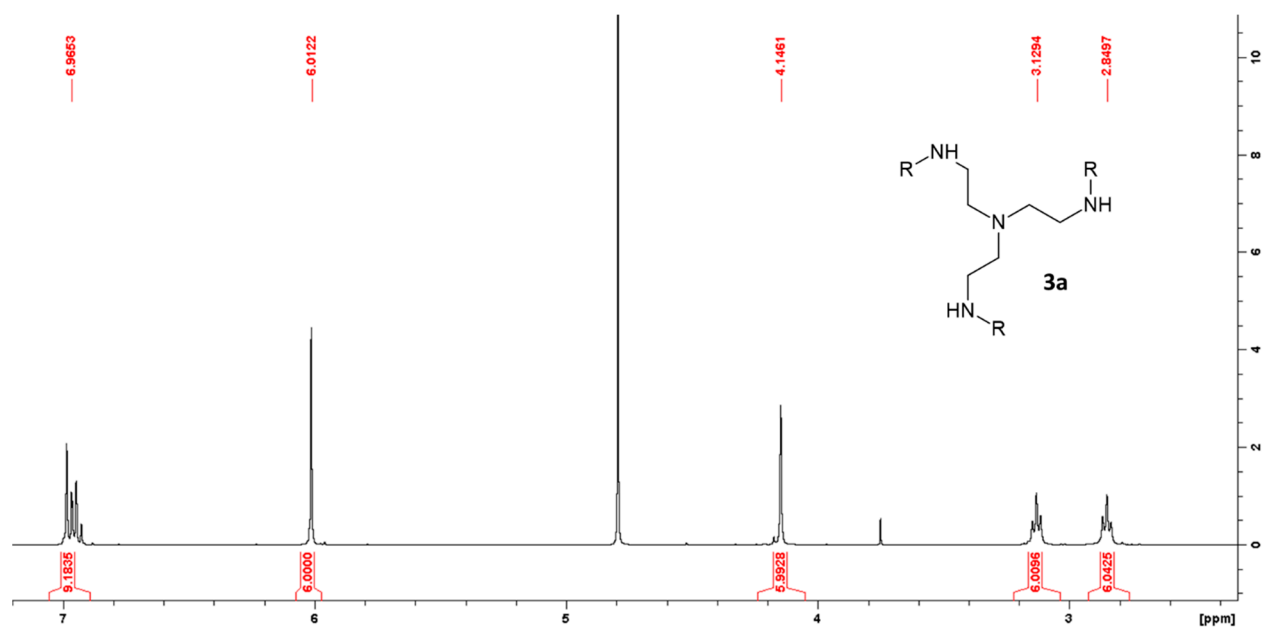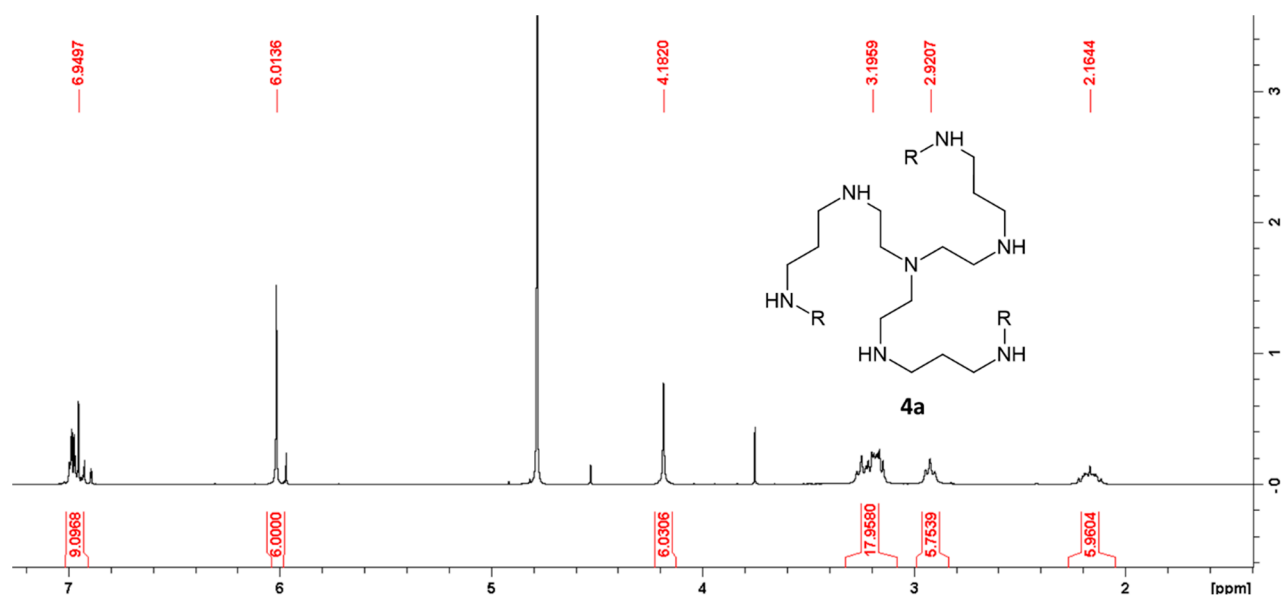

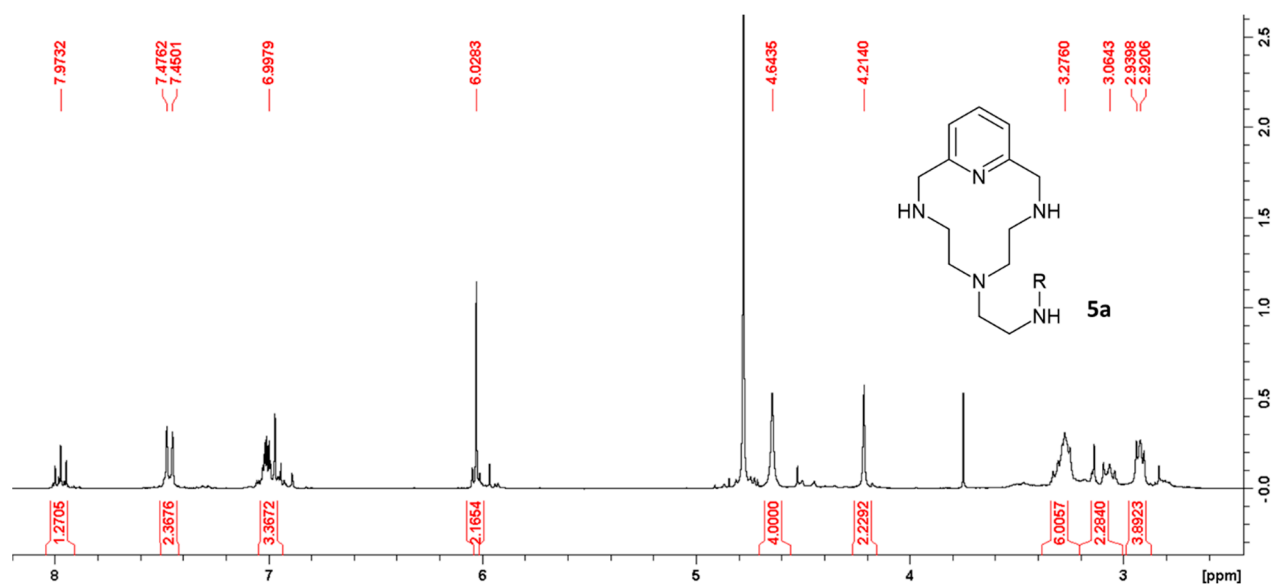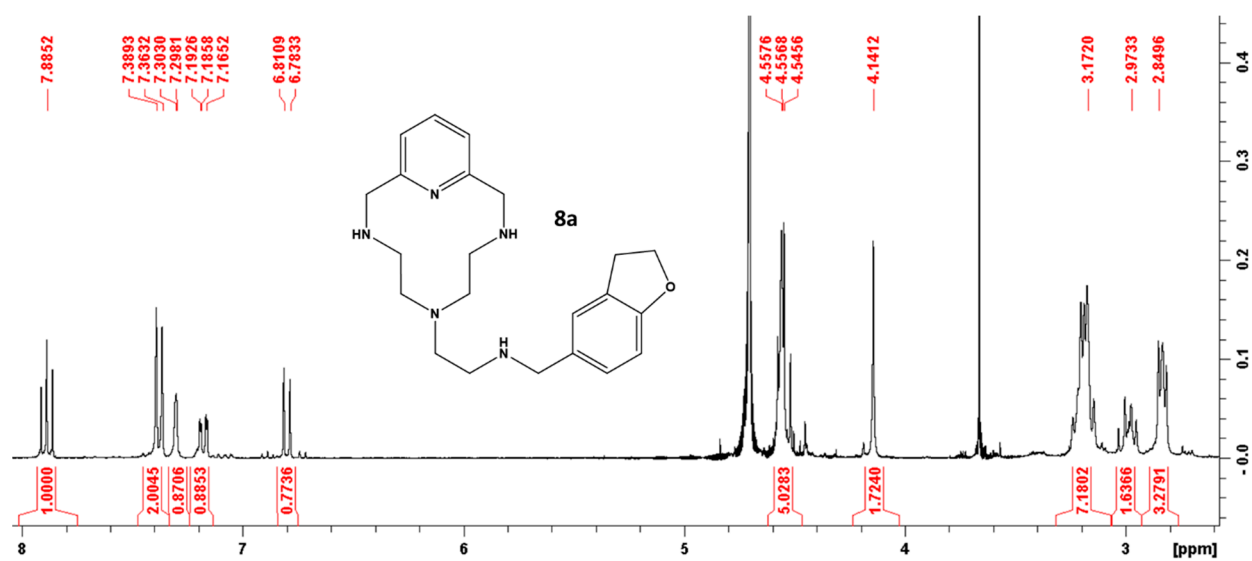

**Figure S2.**  $^{13}\text{C}$  NMR spectra of the new compounds

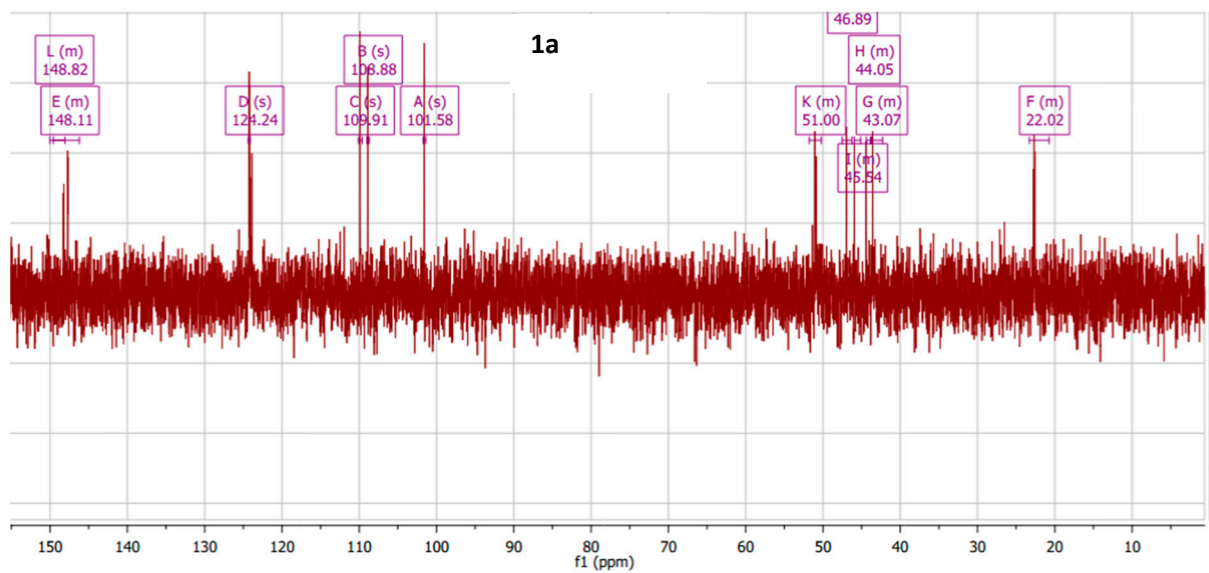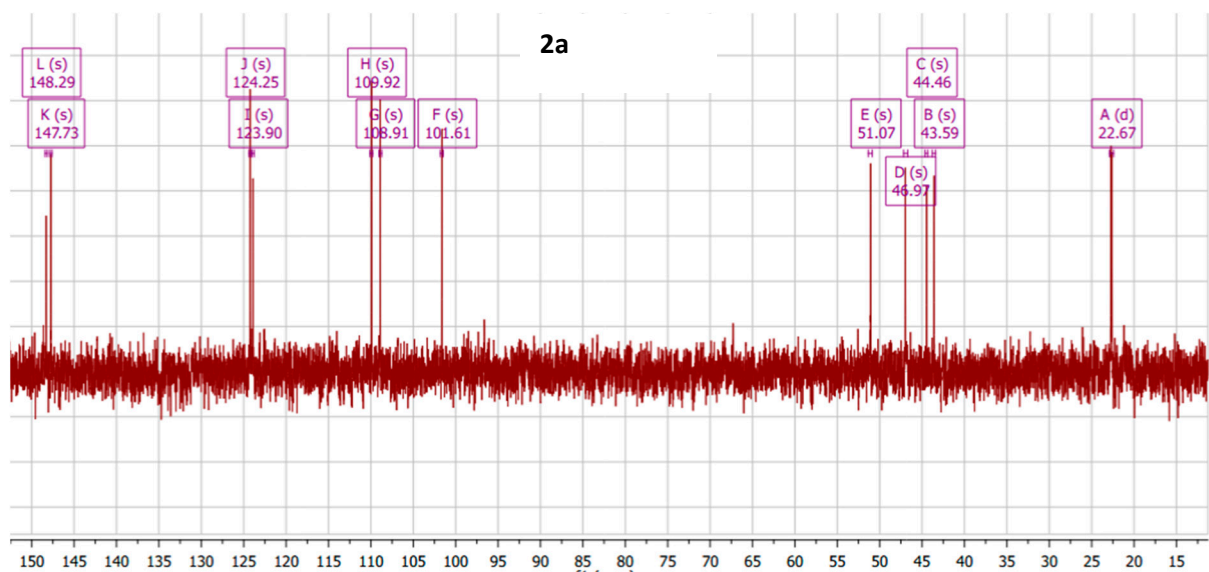

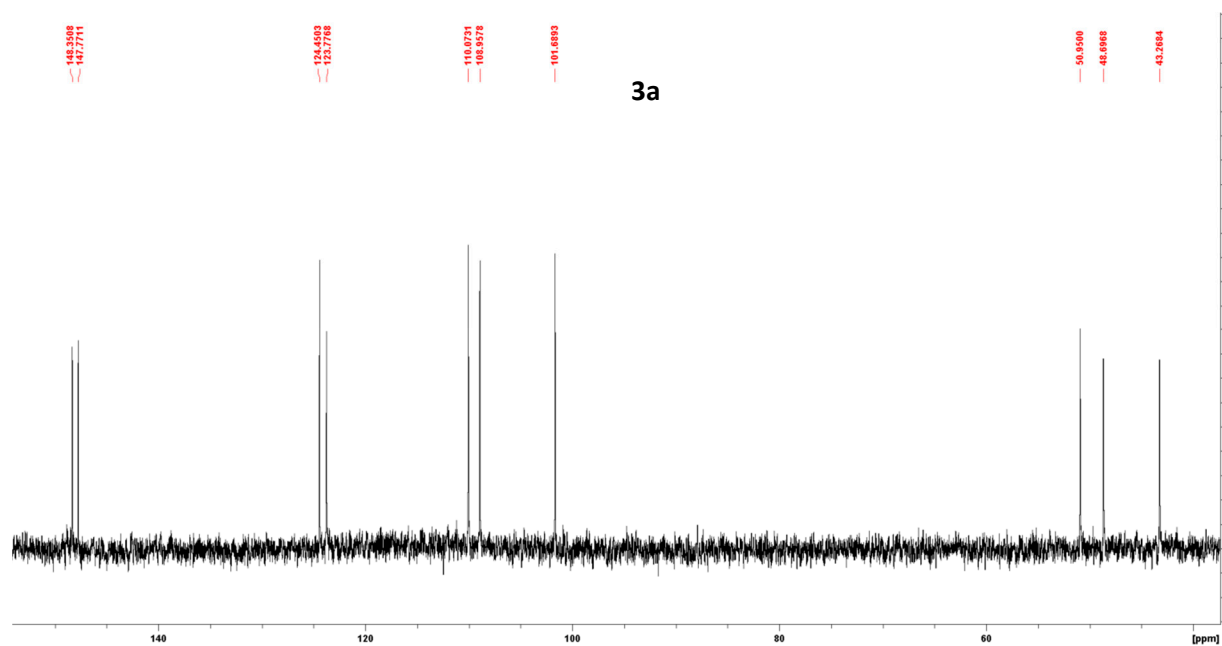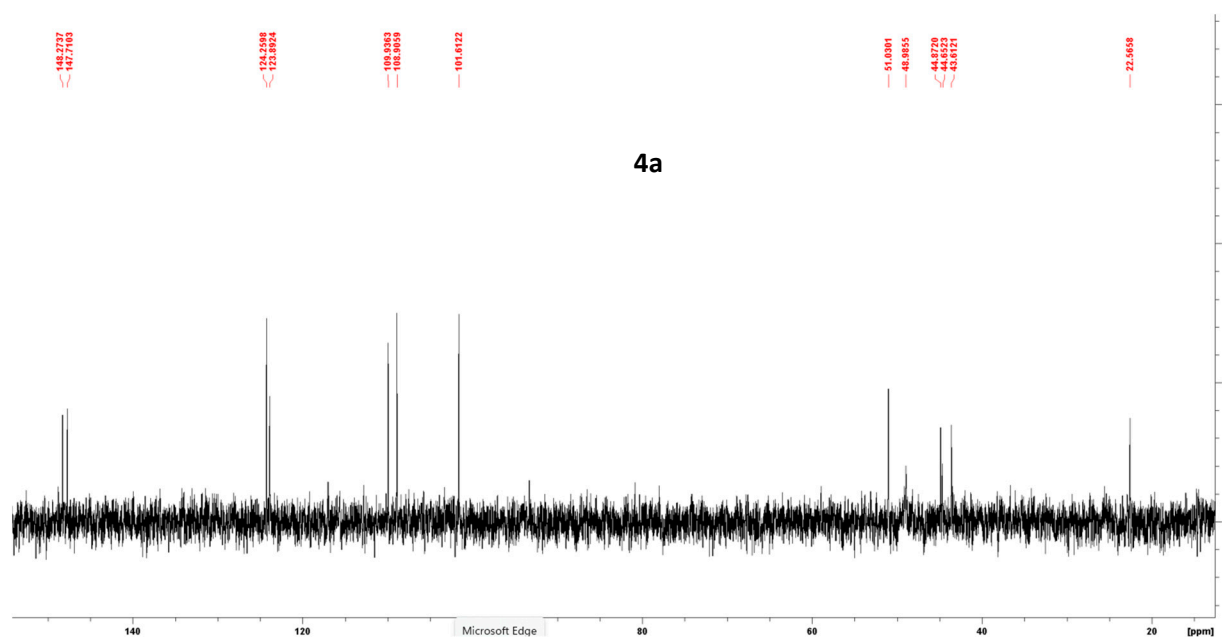

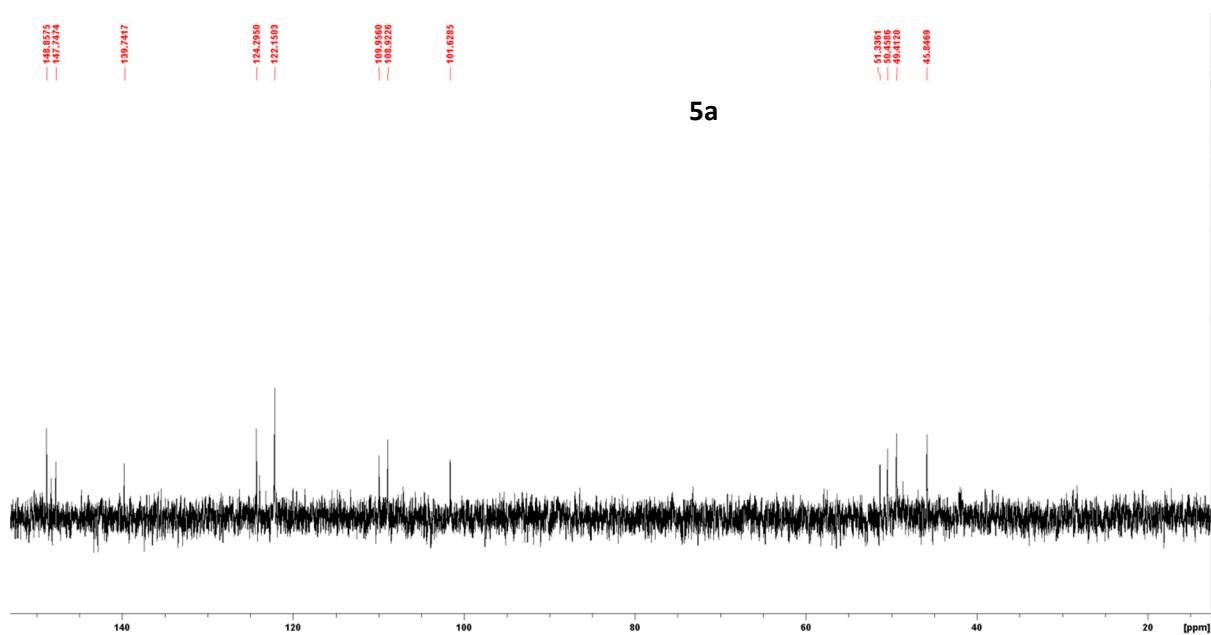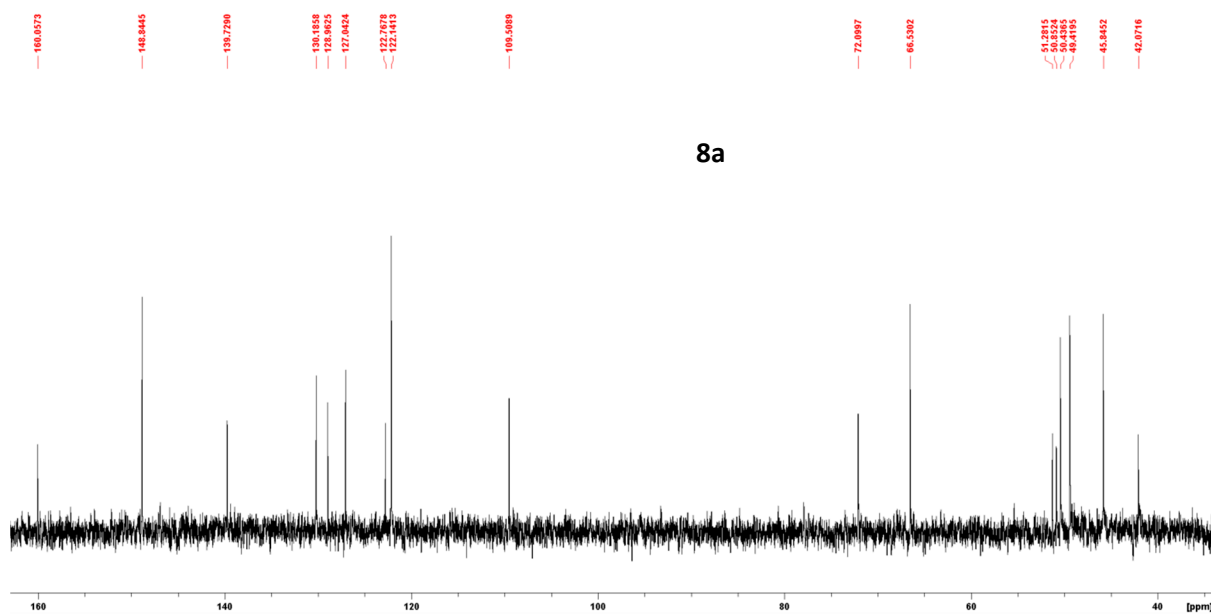

**Figure S3.** ATR-IR spectra of all the new compounds.

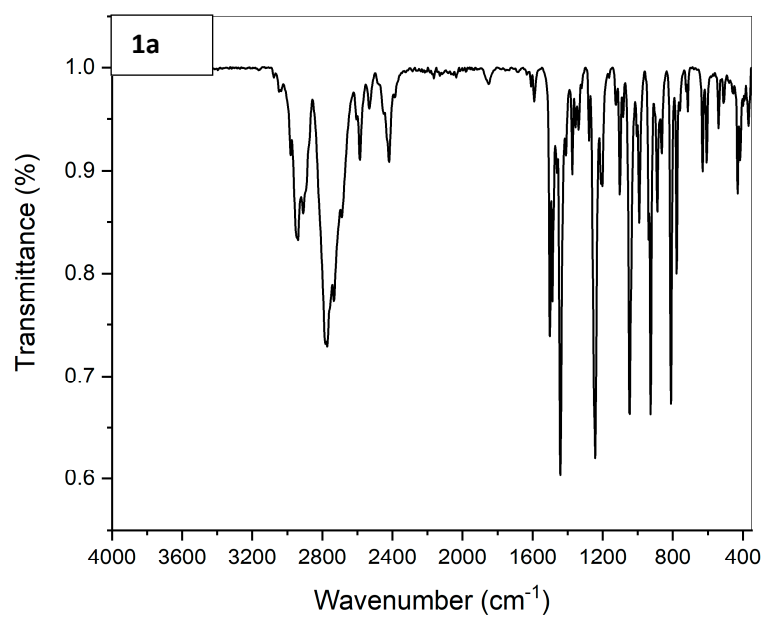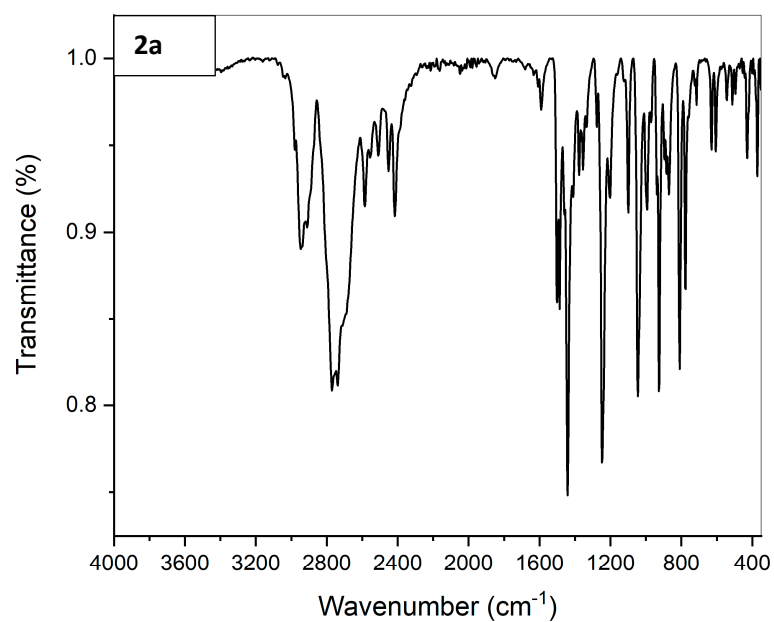



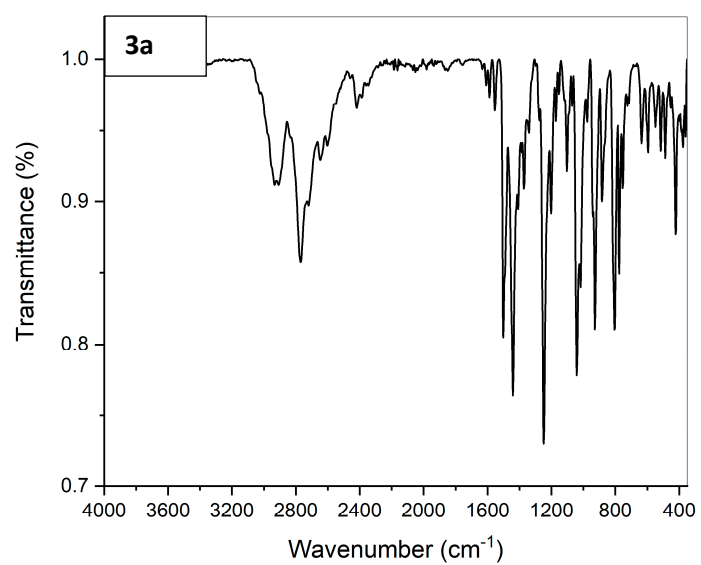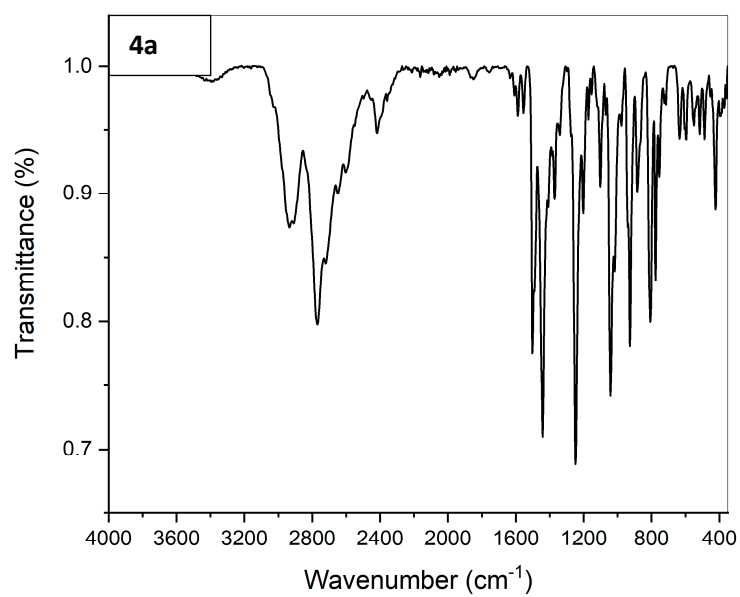

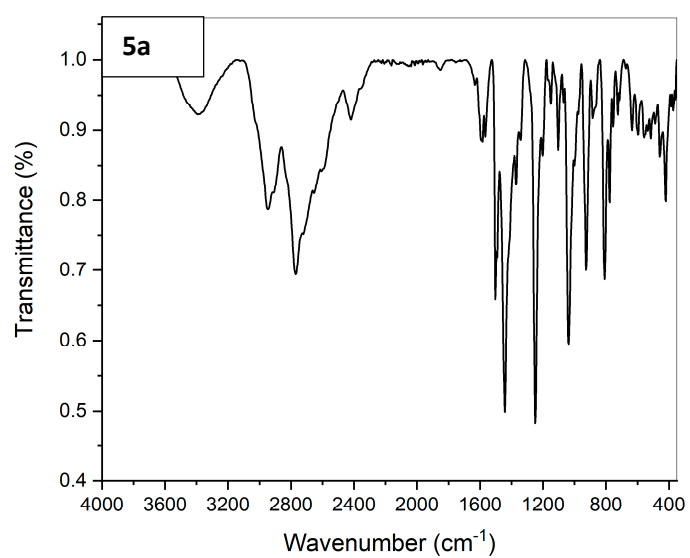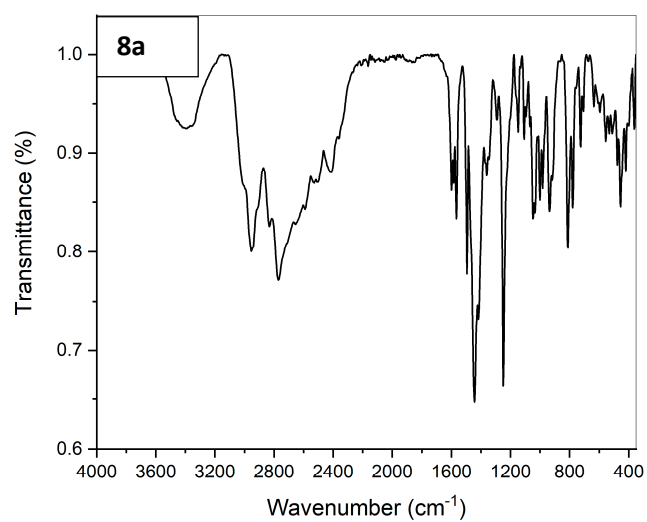

**Figure S4.** Scheme and X-ray crystallographic structure of **3a**·3HCl.

Slow evaporation of vessels containing a concentrated aqueous solution of **3a**·3HCl yielded white crystals suitable for X-ray diffraction. Analysis of single crystals of the ligand was carried out with an Enraf-Nonius KAPPA CCD single-crystal diffractometer ( $\lambda = 0.71073 \text{ \AA}$ ). CIFS of crystal structures have been deposited with the number 2210255.

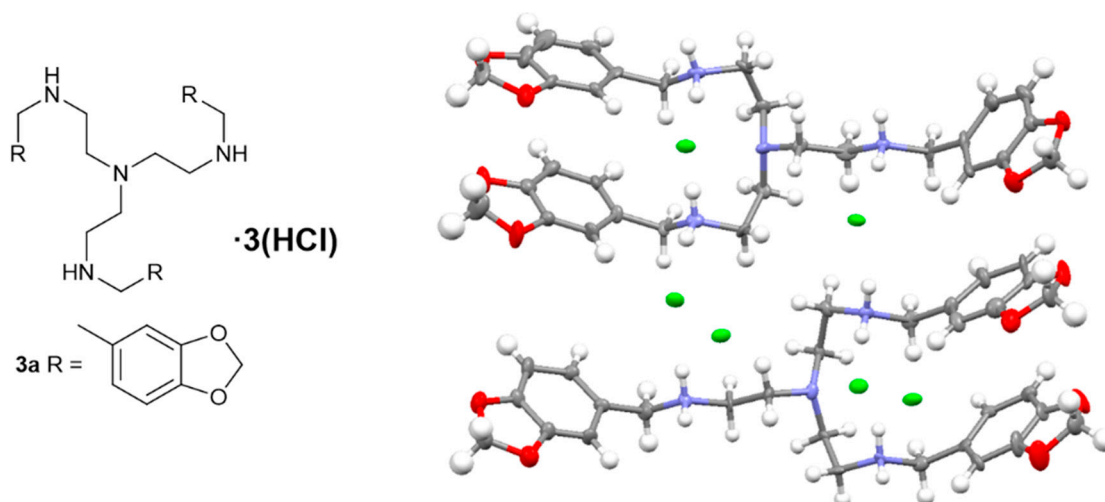

**Table S1.** Crystal data, data collection parameters, and results of the analysis.

| Crystallographic data        |                                                                               |
|------------------------------|-------------------------------------------------------------------------------|
| Formula                      | C <sub>30</sub> H <sub>39</sub> Cl <sub>3</sub> N <sub>4</sub> O <sub>6</sub> |
| Formula weight               | 658.00                                                                        |
| Crystal system               | triclinic                                                                     |
| Space group                  | P 1                                                                           |
| Cell                         |                                                                               |
| <i>a</i> / Å                 | 7.241(4)                                                                      |
| <i>b</i> / Å                 | 11.317(7)                                                                     |
| <i>c</i> / Å                 | 20.092(13)                                                                    |
| $\alpha$ / °                 | 77.11(3)                                                                      |
| $\beta$ / °                  | 87.00(3)                                                                      |
| $\gamma$ / °                 | 76.795(16)                                                                    |
| <i>V</i> / Å <sup>3</sup>    | 1562.5(16)                                                                    |
| <i>Z</i>                     | 2                                                                             |
| <i>T</i> / K                 | 150                                                                           |
| size / mm                    | 0.382 × 0.262 × 0.052                                                         |
| <i>F</i> <sub>000</sub>      | 692                                                                           |
| density / g.cm <sup>-3</sup> | 1.399                                                                         |
| <i>R</i> (int)               | 0.1946                                                                        |
| $\theta_{\text{max}}$ / deg. | 29.982                                                                        |
| $\theta_{\text{min}}$ / deg. | 2.350                                                                         |
| reflections                  |                                                                               |
| - collected                  | 58315                                                                         |
| - unique                     | 8581                                                                          |
| <i>R</i> 1                   |                                                                               |
| - all                        | 0.1221                                                                        |
| - $F^2 > 2\sigma_{F^2}$      | 0.0856                                                                        |
| <i>wR</i> 2                  |                                                                               |
| - all                        | 0.2312                                                                        |
| - $F^2 > 2\sigma_{F^2}$      | 0.2007                                                                        |
| <i>GoF</i>                   | 1.034                                                                         |
| - parameters                 | 777                                                                           |
| - constraints                | 0                                                                             |
| - restraints                 | 39                                                                            |

### Hydrogen bonds

| D--H..A                 | d(D-A) / Å | d(H..A) / Å | d(D, A) / Å | ang(D,H,A) / ° |
|-------------------------|------------|-------------|-------------|----------------|
| N2--H2A..Cl3            | 0.91       | 2.14        | 3.033(14)   | 167            |
| N2--H2B..Cl4[x+1, y, z] | 0.91       | 2.22        | 3.114(12)   | 167            |
| N3--H3A..Cl1[x+1, y, z] | 0.91       | 2.15        | 3.034(10)   | 163            |
| N3--H3B..Cl2            | 0.91       | 2.41        | 3.189(11)   | 144            |
| N4--H4A..Cl2            | 0.91       | 2.25        | 3.145(12)   | 169            |
| N4--H4B..Cl5            | 0.91       | 2.22        | 3.112(11)   | 166            |
| N6--H6A..Cl1[x, y-1, z] | 0.91       | 2.17        | 3.077(9)    | 171            |
| N6--H6B..Cl5            | 0.91       | 2.24        | 3.128(10)   | 165            |
| N7--H7A..Cl6            | 0.91       | 2.29        | 3.200(10)   | 173            |
| N7--H7B..Cl4[x, y-1, z] | 0.91       | 2.21        | 3.106(11)   | 166            |
| N8--H8A..Cl3            | 0.91       | 2.20        | 3.071(12)   | 159            |
| N8--H8B..Cl6            | 0.91       | 2.40        | 3.151(12)   | 140            |

**Figure S5.** Molar fraction species distribution diagrams.

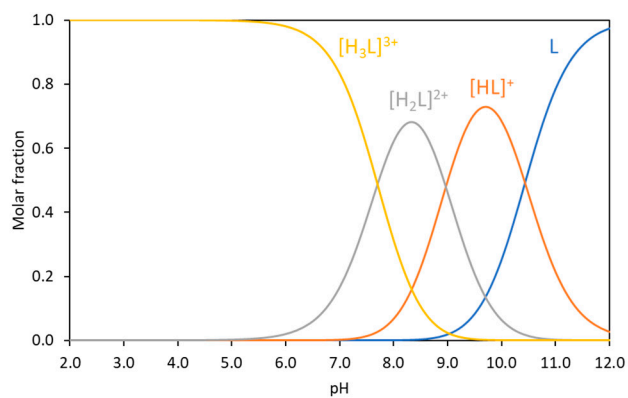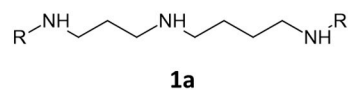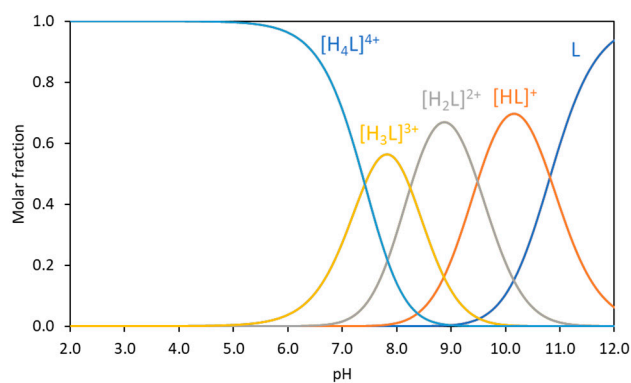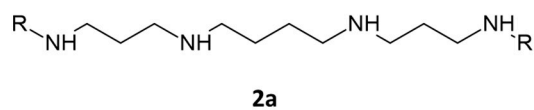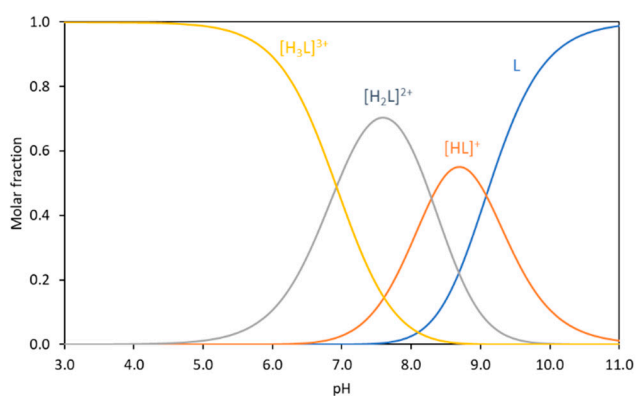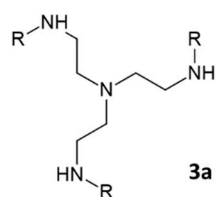

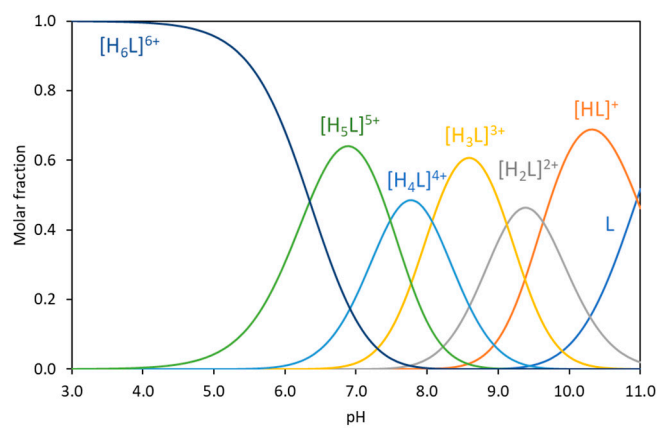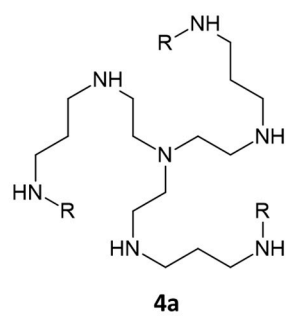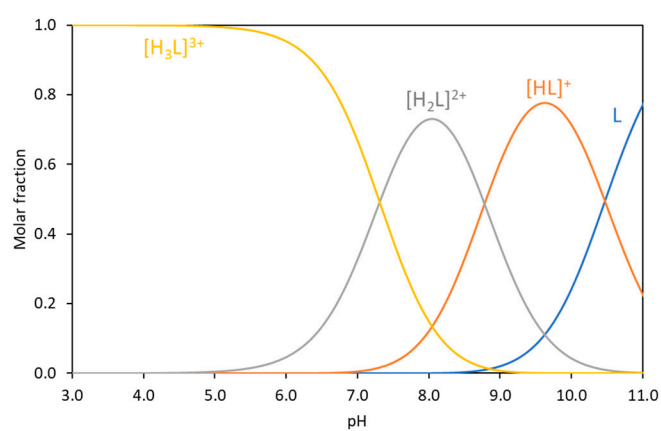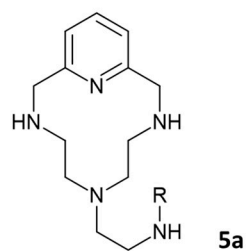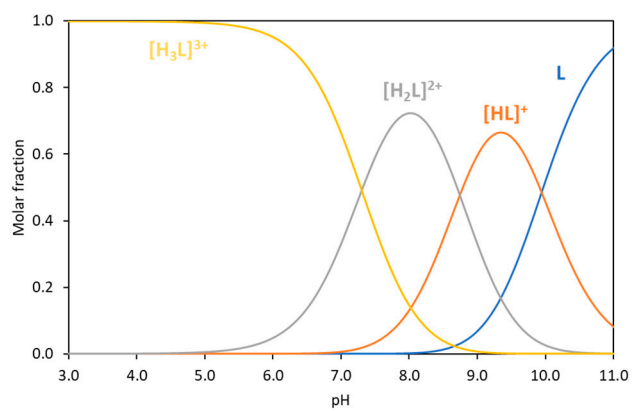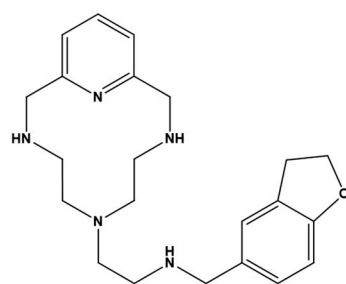

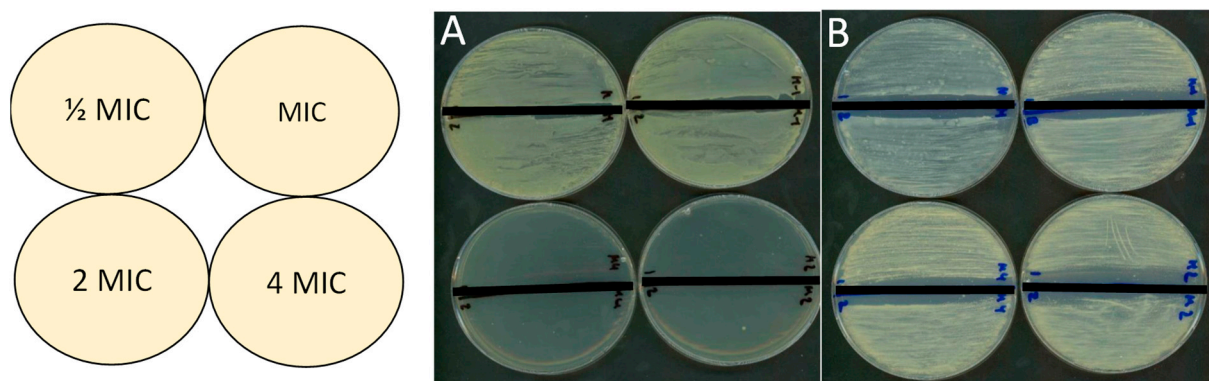

**Figure S6.** Determination of the minimal microbicidal concentration. On the left, a scheme of the plates used for these experiments is shown. In each sector 30  $\mu\text{L}$  of a 10-fold dilution of each one of the tubes described in the experimental section were applied. On the right, representative images of the resulting growth in plate are shown. (A) Compound **4a** in *S. aureus*. (B) Compound **4a** in BY4741.



**A**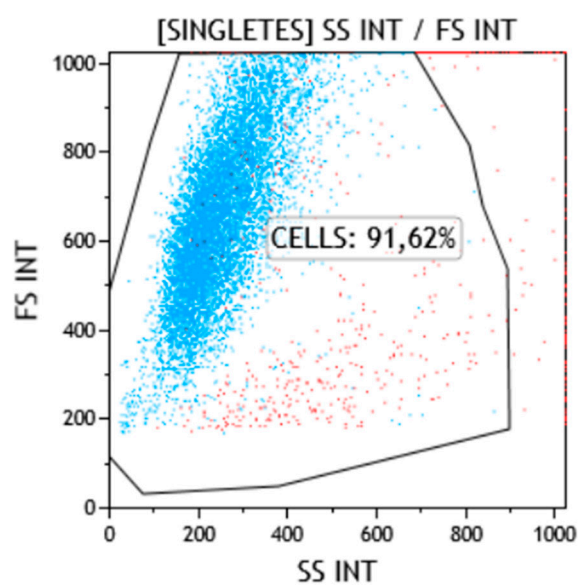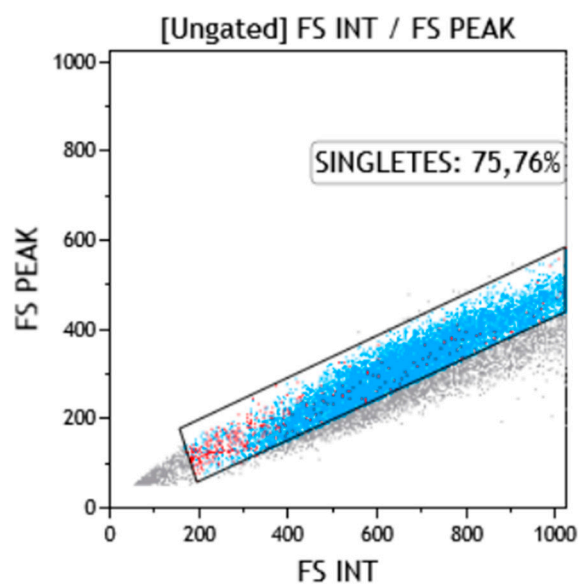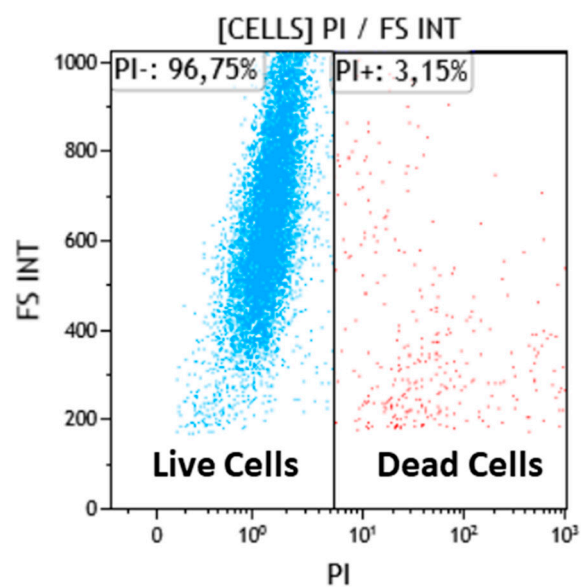

# B

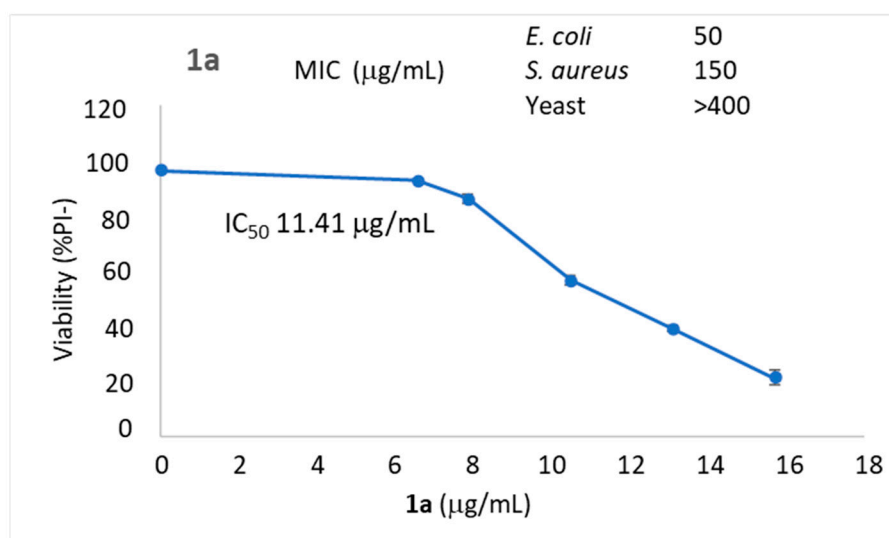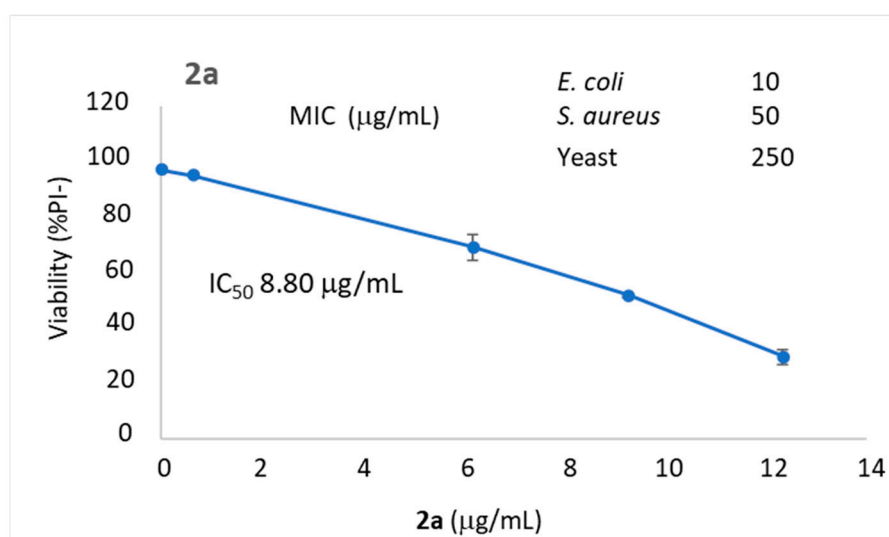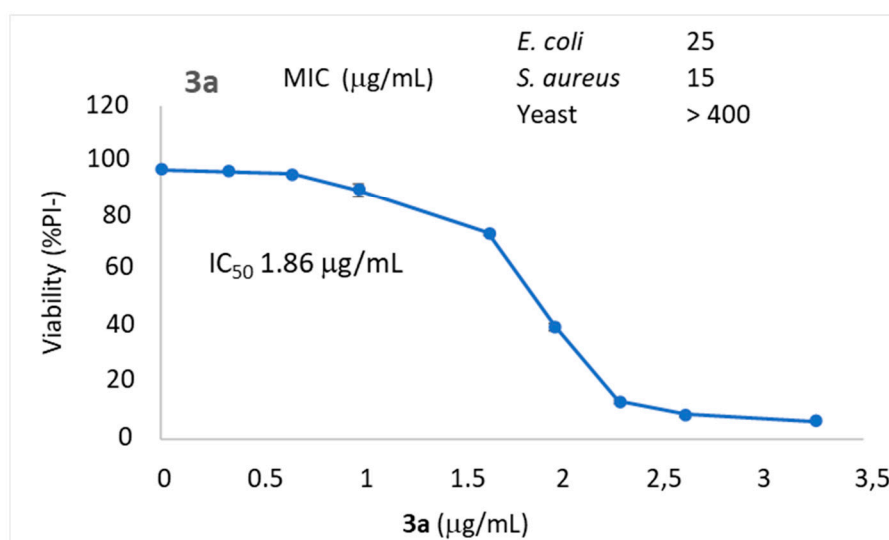

# Bcont

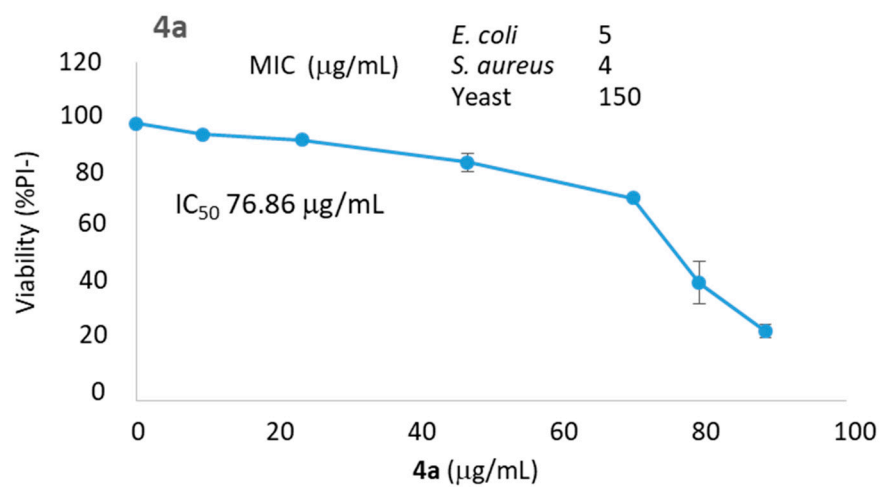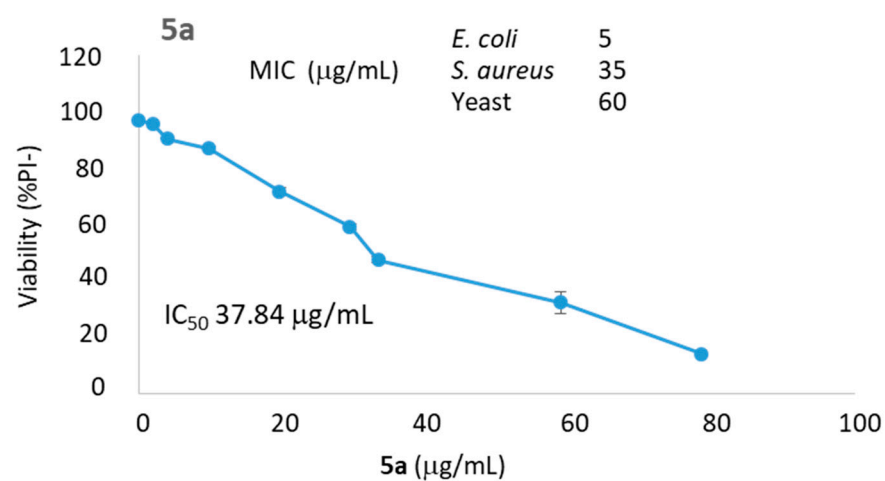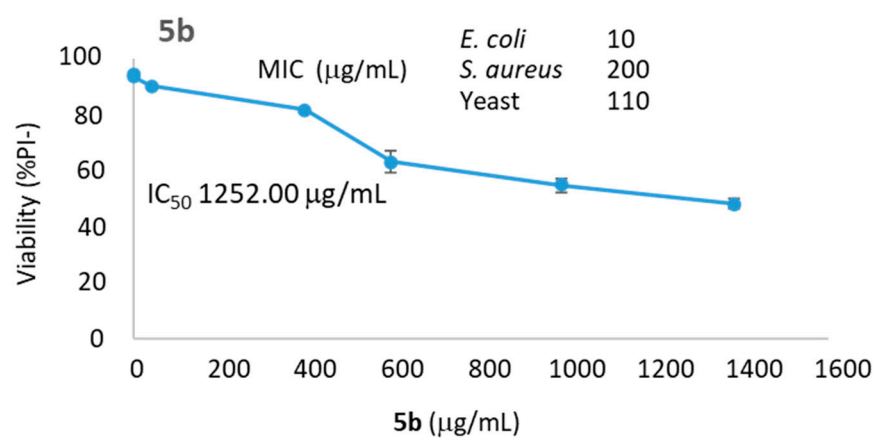

## Bcont

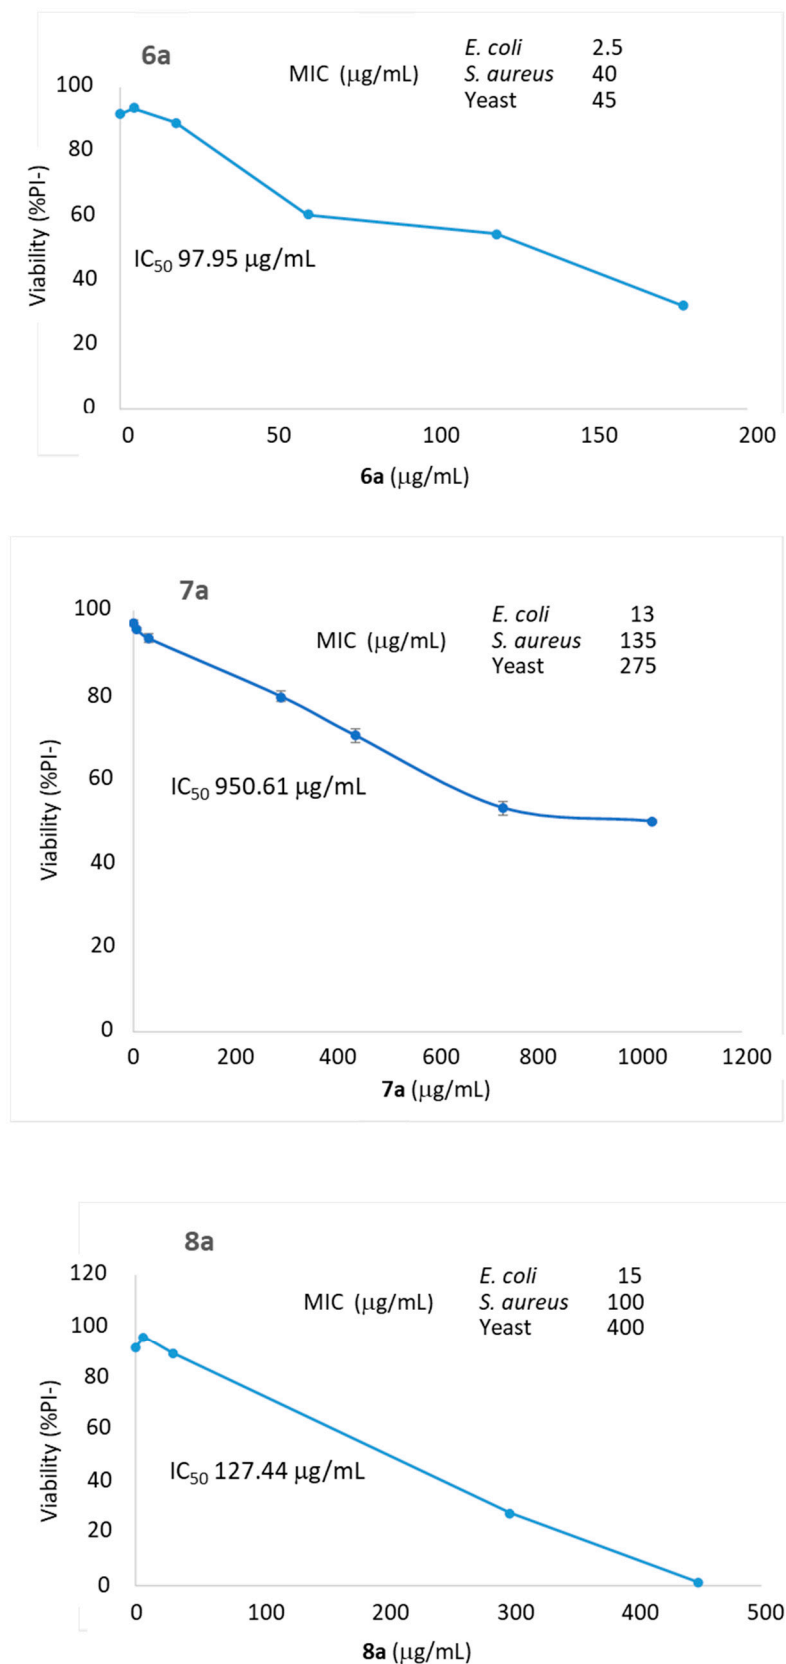

**Figure S7.** Cytotoxicity determination by FACS. (A) Image of the information provided by these analyses. (B) Graphs showing the variation of the Jurkat cells viability in function of the concentration of the compounds tested.
